# Supplementary material for: The Role of Sperm Proteins IZUMO1 and TMEM95 in Mammalian Fertilization: A Systematic Review
Source: MDPI journal article supplement (doi:10.3390/ijms23073929), 2022-04-01
Supplement: s1 [file s1]

**Table S1.** Author/s, year, and title of the 8 articles analysed in this study that studied TMEM95.

| Reference                     | Title                                                                                                                                       |
|-------------------------------|---------------------------------------------------------------------------------------------------------------------------------------------|
| Fernandez-Fuertes et al. 2017 | Subfertility in bulls carrying a nonsense mutation in transmembrane protein 95 is due to failure to interact with the oocyte vestments      |
| Lamas-Toranzo et al. 2020     | TMEM95 is a sperm membrane protein essential for mammalian fertilization                                                                    |
| Liu et al. 2017               | A novel synonymous SNP (A47A) of the TMEM95 gene is significantly associated with the reproductive traits related to testis in male piglets |
| Noda et al. 2020              | Sperm proteins SOF1, TMEM95, and SPACA6 are required for sperm-oocyte fusion in mice                                                        |
| Pausch et al. 2014            | A nonsense mutation in TMEM95 encoding a nondescript transmembrane protein causes idiopathic male subfertility in cattle                    |
| Shireesha et al. 2021         | Bioinformatic characterization of the Transmembrane protein95 gene (TMEM95) in Murrah buffalo (Bubalus brialis)                             |
| Zhang et al. 2016             | Identification of novel alternative splicing transcript and expression analysis of bovine TMEM95 gene                                       |
| Zhang et al. 2019             | Detection of Bovine TMEM95 p.Cys161X Mutation in 13 Chinese Indigenous Cattle Breeds                                                        |

**Table S2.** Author/s, year, and title of the 57 articles analysed in this study that studied IZUMO1.

| Reference                     | Title                                                                                                                                                                   |
|-------------------------------|-------------------------------------------------------------------------------------------------------------------------------------------------------------------------|
| An et al. 2009                | In vitro and in vivo studies evaluating recombinant plasmid pCXN2-mIzumo as a potential immunocontraceptive antigen                                                     |
| Aydin et al. 2016             | Molecular architecture of the human sperm IZUMO1 and egg JUNO fertilization complex                                                                                     |
| Baker et al. 2012             | Analysis of phosphopeptide changes as spermatozoa acquire functional competence in the epididymis demonstrates changes in the post-translational modification of Izumo1 |
| Barbaux et al. 2020           | Sperm SPACA6 protein is required for mammalian Sperm-Egg Adhesion/Fusion                                                                                                |
| Bianchi and Wright 2015       | Cross-species fertilization: the hamster egg receptor, Juno, binds the human sperm ligand, Izumo1                                                                       |
| Chalbi et al. 2014            | Binding of sperm protein Izumo1 and its egg receptor Juno drives Cd9 accumulation in the intercellular contact area prior to fusion during mammalian fertilization      |
| Clark and Naz 2013            | Presence and incidence of izumo antibodies in sera of immunoinfertile women and men                                                                                     |
| Ellerman et al. 2009          | Izumo is part of a multiprotein family whose members form large complexes on mammalian sperm                                                                            |
| Fard and Shamsir 2013         | Construction and Analysis of the Cell Surface's Protein Network for Human Sperm-Egg Interaction                                                                         |
| Fujihara et al. 2020          | Spermatozoa lacking Fertilization Influencing Membrane Protein (FIMP) fail to fuse with oocytes in mice                                                                 |
| Fukuda et al. 2016            | Changes of IZUMO1 in bull spermatozoa during the maturation, acrosome reaction, and cryopreservation                                                                    |
| Gaikwad et al. 2019           | GLIPR1L1 is an IZUMO-binding protein required for optimal fertilization in the mouse                                                                                    |
| Granados-Gonzalez et al. 2008 | Preliminary study on the role of the human IZUMO gene in oocyte-spermatozoa fusion failure                                                                              |
| Gundogan and Aktas 2021       | Immunolocalization of Fertilin $\beta$ , IZUMO1, and P34H in Ram Spermatozoa                                                                                            |
| Guo et al. 2019               | Proteomic Analysis of Dpy19l2-Deficient Human Globozoospermia Reveals Multiple Molecular Defects                                                                        |
| Hu et al. 2021                | Expression, structure and function analysis of the sperm-oocyte fusion genes Juno and Izumo1 in sheep ( <i>Ovis aries</i> )                                             |
| Inoue et al. 2010             | Identification and disruption of sperm-specific angiotensin converting enzyme-3 (ACE3) in mouse                                                                         |
| Inoue et al. 2011             | Acrosome-reacted mouse spermatozoa recovered from the perivitelline space can fertilize other eggs                                                                      |
| Inoue et al. 2013             | Molecular dissection of IZUMO1, a sperm protein essential for sperm-egg fusion                                                                                          |
| Inoue et al. 2015             | Oocyte-triggered dimerization of sperm IZUMO1 promotes sperm-egg fusion in mice                                                                                         |
| Inoue, Hagihara and Wada 2021 | Evolutionarily conserved sperm factors, DCST1 and DCST2, are required for gamete fusion                                                                                 |
| Inoue, Ikawa and Okabe 2008   | Putative sperm fusion protein IZUMO and the role of N-glycosylation                                                                                                     |
| Inoue, Saito, and Wada 2020   | Unveiling a novel function of CD9 in surface compartmentalization of oocytes                                                                                            |
| Inoue and Wada 2018           | Monitoring dimeric status of IZUMO1 during the acrosome reaction in living spermatozoon                                                                                 |
| Ito et al 2018                | Deletion of Eqtn in mice reduces male fertility and sperm-egg adhesion                                                                                                  |
| Kalgar et al. 2019            | Expression Analysis of IZUMO1 Gene during Testicular Development of Datong Yak ( <i>Bos Grunniens</i> )                                                                 |

**Table S2. Cont.**

| Reference                         | Title                                                                                                                                                                                       |
|-----------------------------------|---------------------------------------------------------------------------------------------------------------------------------------------------------------------------------------------|
| Kato et al. 2016                  | Structural and functional insights into IZUMO1 recognition by JUNO in mammalian fertilization                                                                                               |
| Kim et al. 2013                   | Molecular cloning, characterization of porcine IZUMO1, an IgSF family member                                                                                                                |
| Kim 2015                          | Molecular cloning and characterization of Izumo1 gene from bovine testis                                                                                                                    |
| Kumar et al. 2021                 | Unraveling Subcellular and Ultrastructural Changes During Vitriification of Human Spermatozoa: Effect of a Mitochondria-Targeted Antioxidant and a Permeable Cryoprotectant                 |
| Llavanera et al. 2019             | GSTM3, but not IZUMO1, is a cryotolerance marker of boar sperm                                                                                                                              |
| Marcello and Evans 2010           | Multivariate analysis of male reproductive function in Inpp5b-/- mice reveals heterogeneity in defects in fertility, sperm-egg membrane interaction and proteolytic cleavage of sperm ADAMs |
| Marcello et al. 2011              | Lack of tyrosylprotein sulfotransferase-2 activity results in altered sperm-egg interactions and loss of ADAM3 and ADAM6 in epididymal sperm                                                |
| Miranda et al. 2009               | Localization of low-density detergent-resistant membrane proteins in intact and acrosome-reacted mouse sperm                                                                                |
| Mortazavi et al. 2021             | Evaluation of multi-epitope recombinant protein as a candidate for a contraceptive vaccine                                                                                                  |
| Nagdas et al. 2016                | Identification of bovine sperm acrosomal proteins that interact with a 32-kDa acrosomal matrix protein                                                                                      |
| Naz 2008                          | Immunocontraceptive effect of izumo and enhancement by combination vaccination                                                                                                              |
| Naz 2014                          | Vaccine for human contraception targeting sperm Izumo protein and YLP12 dodecamer peptide                                                                                                   |
| Nishimura et al. 2011             | Characterization of mouse sperm TMEM190, a small transmembrane protein with the trefoil domain: evidence for co-localization with IZUMO1 and complex formation with other sperm proteins    |
| Rival et al. 2019                 | Phosphatidylserine on viable sperm and phagocytic machinery in oocytes regulate mammalian fertilization                                                                                     |
| Saito, Wada and Inoue 2019        | Alternative splicing of the Izumo1 gene ensures triggering gamete fusion in mice                                                                                                            |
| Saito, Wada, and Inoue 2019       | Sperm IZUMO1-Dependent Gamete Fusion Influences Male Fertility in Mice                                                                                                                      |
| Satouh et al. 2012                | Visualization of the moment of mouse sperm-egg fusion and dynamic localization of IZUMO1                                                                                                    |
| Sebkova et al. 2014               | Progress of sperm IZUMO1 relocation during spontaneous acrosome reaction                                                                                                                    |
| Sosnik, Buffone and Visconti 2010 | Analysis of CAPZA3 localization reveals temporally discrete events during the acrosome reaction                                                                                             |
| Sosnik et al. 2009                | Tssk6 is required for Izumo relocation and gamete fusion in the mouse                                                                                                                       |
| Tanihara et al. 2014              | Roles of the zona pellucida and functional exposure of the sperm-egg fusion factor 'IZUMO' during in vitro fertilization in pigs                                                            |
| Thérien and Manjunath 2003        | Effects of latrunculin A on the relocation of sperm IZUMO1 during gamete interaction in mouse                                                                                               |
| Wang et al. 2008                  | Investigation of recombinant mouse sperm protein izumo as a potential immunocontraceptive antigen                                                                                           |
| Wang et al. 2009                  | Immunocontraceptive potential of the Ig-like domain of Izumo                                                                                                                                |
| Xing et al. 2011                  | Molecular cloning and characterization of Izumo1 gene from sheep and cashmere goat reveal alternative splicing                                                                              |
| Xue et al. 2016                   | Vaccination with an Epitope Peptide of IZUMO1 to Induce Contraception in Female Mice                                                                                                        |
| Yamaguchi et al. 2006             | Aberrant Distribution of ADAM3 in Sperm from Both Angiotensin-Converting Enzyme (Ace)- and Calmegin (Clgn)-Deficient Mice                                                                   |
| Yamashita et al. 2007             | Acrosome reaction of mouse epididymal sperm on oocyte zona pellucida                                                                                                                        |
| Yamatoya et al. 2020              | Cleavage of SPACA1 regulates assembly of sperm-egg membrane fusion machinery in mature spermatozoa†                                                                                         |
| Young et al 2016                  | CRISPR/Cas9-mediated mutation revealed cytoplasmic tail is dispensable for IZUMO1 function and male fertility                                                                               |
| Zhi-da et al. 2010                | Prokaryotic Expression, Ascitic Polyclonal Antibody Preparation and Identification of Cashmere Goat Izumo1                                                                                  |

**Table S3.** Author/s, year, and title of the 19 reviews analysed in this study that reviewed IZUMO1.

| Reference                                     | Title                                                                                               |
|-----------------------------------------------|-----------------------------------------------------------------------------------------------------|
| Bianchi and Wright 2016                       | Sperm Meets Egg: The Genetics of Mammalian Fertilization                                            |
| Cuasnicú et al. 2016                          | Acrosome Reaction as a Preparation for Gamete Fusion                                                |
| Evans 2011                                    | Sperm-egg interaction                                                                               |
| Harada et al. 2013                            | Critical role of exosomes in sperm-egg fusion and virus-induced cell-cell fusion                    |
| Inoue 2016                                    | Novel insights into the molecular mechanism of sperm-egg fusion via IZUMO1                          |
| Inoue, Ikawa, and Okabe 2011                  | The mechanism of sperm-egg interaction and the involvement of IZUMO1 in fusion                      |
| Ito and Toshimori 2016                        | Acrosome markers of human sperm                                                                     |
| Jiménez-Movilla, Hamze, and Romar 2021        | Oolemma Receptors in Mammalian Molecular Fertilization: Function and New Methods of Study           |
| Klinovska, Sebkova and Dvorakova-Hortova 2014 | Sperm-egg fusion: a molecular enigma of mammalian reproduction                                      |
| Liu 2015                                      | Capacitation-Associated Glycocomponents of Mammalian Sperm                                          |
| Mou and Xie 2017                              | Male infertility-related molecules involved in sperm-oocyte fusion                                  |
| Muro and Okabe 2013                           | Mechanisms of Fertilization-A View From the Study of Gene-Manipulated Mice                          |
| Okabe 2013                                    | The cell biology of mammalian fertilization                                                         |
| Sabetian and Shamsir 2017                     | Deficiency in Sperm-Egg Protein Interaction as a Major Cause of Fertilization Failure               |
| Satouh and Ikawa 2018                         | New Insights into the Molecular Events of Mammalian Fertilization                                   |
| Sun et al. 2019                               | Effects of sperm proteins on fertilization in the female reproductive tract                         |
| Toshimori 2011                                | Dynamics of the mammalian sperm membrane modification leading to fertilization: a cytological study |
| Yeste et al. 2017                             | Oocyte Activation and Fertilisation: Crucial Contributors from the Sperm and Oocyte                 |
| Young, Aitken and Baker 2015                  | Phosphorylation of Izumo1 and Its Role in Male Infertility                                          |

**Table S4.** Author/s, year, and title of the 12 other type of publication – letter, chapter, comment, correspondence— analysed in this study that studied IZUMO1.

| Reference                | Title                                                                                                                  |
|--------------------------|------------------------------------------------------------------------------------------------------------------------|
| Bianchi and Wright 2014  | Izumo meets Juno: preventing polyspermy in fertilization                                                               |
| Gerhardt 2016            | IZUMO1-JUNO Union Promotes Fertilization                                                                               |
| Gupta 2014               | Unraveling the intricacies of mammalian fertilization                                                                  |
| Hayasaka et al. 2007     | Positive expression of the immunoglobulin superfamily protein IZUMO on human sperm of severely infertile male patients |
| Inoue et al. 2005        | The immunoglobulin superfamily protein Izumo is required for sperm to fuse with eggs                                   |
| Inoue and Okabe 2010     | Gamete fusion and sperm protein IZUMO1                                                                                 |
| Melcher 2016             | Structural biology: When sperm meets egg                                                                               |
| Miyado et al. 2018       | Regulation of Sperm-Egg Fusion at the Plasma Membrane                                                                  |
| Nishimura et al. 2016    | The structure of sperm Izumo1 reveals unexpected similarities with Plasmodium invasion proteins                        |
| Ohto et al. 2016         | Structure of IZUMO1-JUNO reveals sperm-oocyte recognition during mammalian fertilization                               |
| Schultz and William 2005 | Developmental biology: sperm-egg fusion unscrambled                                                                    |
| Wassarman 2014           | Reproductive biology: Sperm protein finds its mate                                                                     |
